# Supplementary material for: Mulberry leaf polysaccharides ameliorate obesity through activation of brown adipose tissue and modulation of the gut microbiota in high-fat diet fed mice
Source: Royal Society of Chemistry journal article supplement (doi:10.1039/d1fo02324a), 2021-12-24
Supplement: d1fo02324a1.pdf [file d1fo02324a1.pdf]

## Supplementary materials

### Figure legends

**Fig. S1** Rarefaction (A) and Shannon (B) curve of mice.

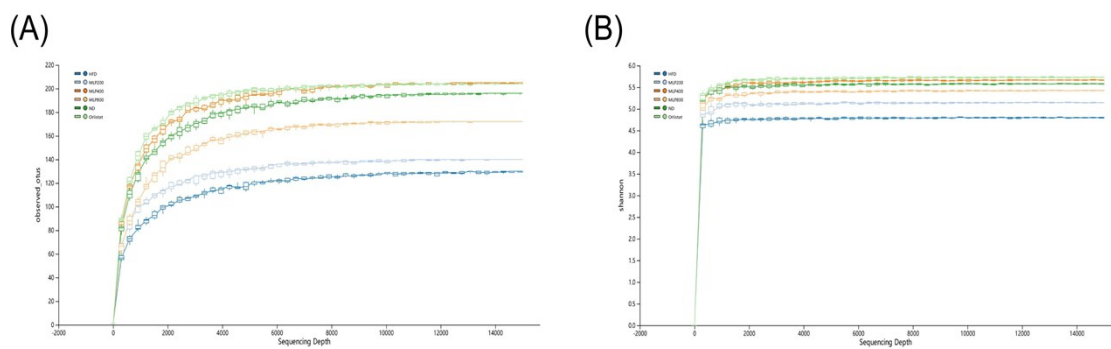

**Table S1.** Primers for gene used for RT-PCR.

| Gene            | Forward sequence             | Reverse sequence            |
|-----------------|------------------------------|-----------------------------|
| C/EBP- $\alpha$ | 5'-GGCTCCTAATCCCTTGCT-3'     | 5'-TACCACATGGCTAACTCACAA-3' |
| SREBP-          | 5'-GGGGCCTGACAGGTGAAATC-3'   | 5'-GGAGGCCAGAGAAGCAGAAG-3'  |
| FAS             | 5'-GGCCCCTCTGTTAATTGGCT-3'   | 5'-GGATCTCAGGGTTGGGGTTG-3'  |
| PPAR- $\alpha$  | 5'-GAGGGTTGAGCTCAGTCAGG-3'   | 5'-GGTCACCTACGAGTGGCATT-3'  |
| PPAR- $\gamma$  | 5'-ATTGAGTGCCGAGTCTGTGG-3'   | 5'-ACCTGATGGCATTGTGAGACA-3' |
| CPT-1 $\alpha$  | 5'-AAACCCACCAGGCTACAGTG-3'   | 5'-TCCTTGTAATGTGCGAGCTG-3'  |
| SIRT1           | 5'-GCCAGAGTCCAAGTTTAGAAGA-3' | 5'-CCATCAGTCCCAAATCCAG-3'   |
| PRDM16          | 5'-GGCGAGGAAGCTAGCCAAA-3'    | 5'-GGTCTCCTCCTCGGCACTCT-3'  |
| UCP-1           | 5'-CACCTTCCCGCTGGACACT-3'    | 5'-TCGGCAATCCTTCTGTTT-3'    |
| PGC-1 $\alpha$  | 5'-ACAGGAACAGCAGCAGAG-3'     | 5'-TAAGGTTTCGCTCAATAGTC-3'  |
| GAPDH           | 5'-GCTGGAGTCTTGTCAGGCAT-3'   | 5'-CCCTGTACATGCTGGAGTTGAG-  |
